# Supplementary material for: Reduction of NgR in perforant path protects neuronal morphology and function in APP/PS1 transgenic mice
Source: publisher site journal article supplement (doi:10.18632/aging.204605), 2023-03-23
Supplement: Supplementary file [file aging-v15i6-204605-supplementary-material-SD1.pdf]

## SUPPLEMENTARY FIGURES

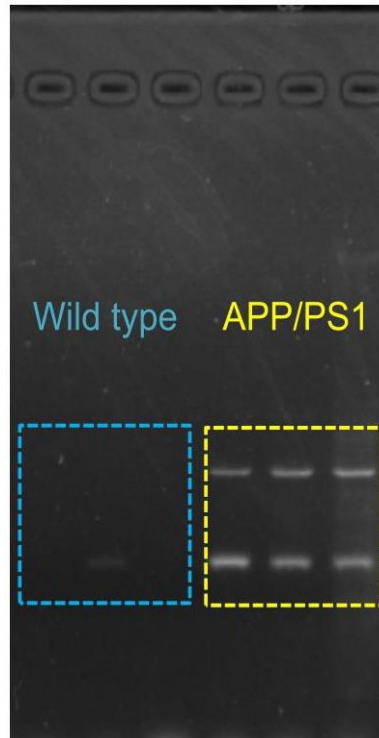

**Supplementary Figure 1. Genotyping of APP/PS1 mice.** Representative images of genotyping of APP/PS1 mice. The appearance of double bands represents APP/PS1 mice whereas the absence of the band represents the wildtype mice.

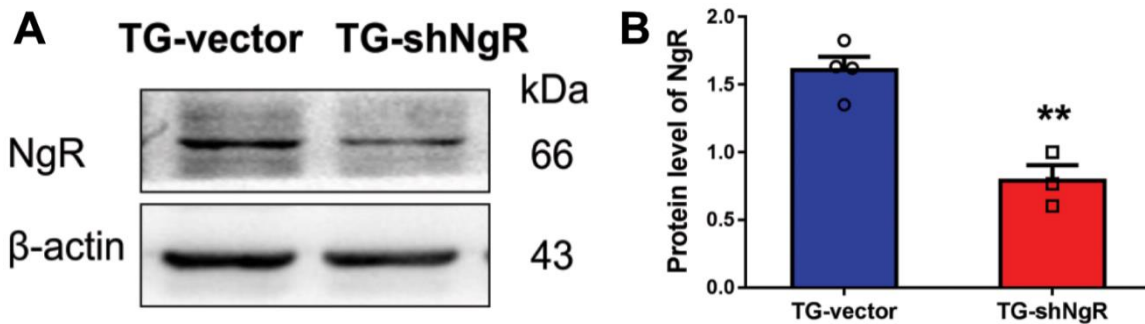

**Supplementary Figure 2. Evaluation of the infection efficiency after injection of AAV expressing plasmids pAKD-CMV-bGlobin-eGFP-H1-shNgR into the perforant path three months.** (A, B) Expressions of NgR in the perforant path by Western blotting and densitometry analysis of protein levels. Data are presented as mean  $\pm$  SEM. n = 3-4 male mice/group. The statistical analysis was performed by Student's *t*-test. \*\**P* < 0.01
